# Supplementary material
Source: Springer Nature journal article supplement (https://www.springermedizin.de/resource/supplementary/12885_2009_2096_MOESM4_ESM.pdf/9460510)

A

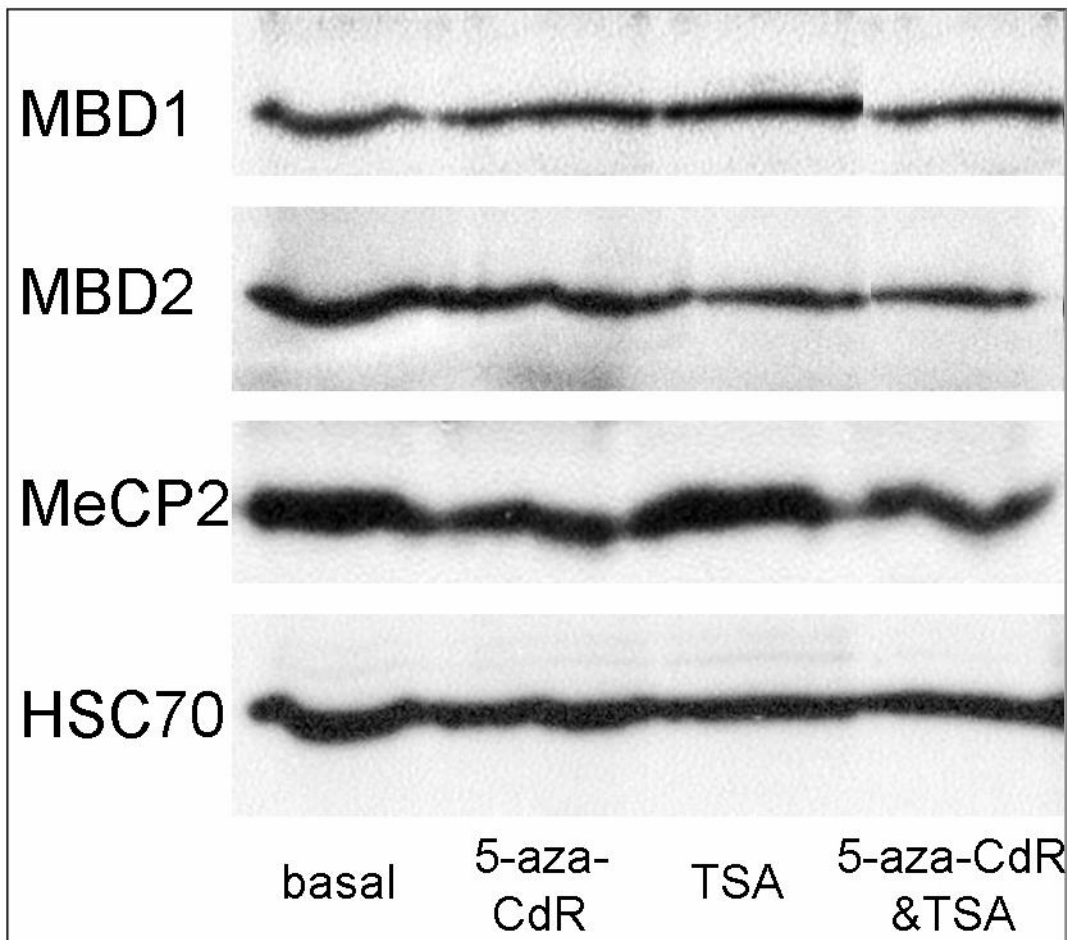

B

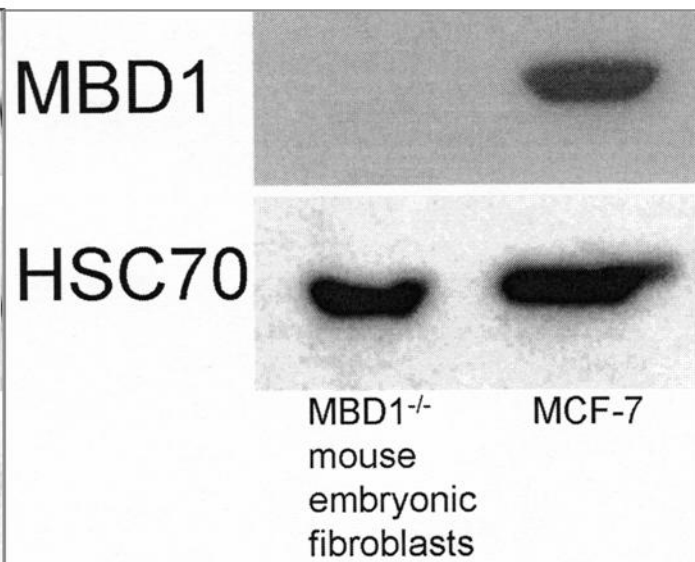

Supplement: MOESM4 [file 9460510]
